## Population dynamics of HIV drug resistance during treatment scale-up in Uganda: a population-based longitudinal study

Michael A. Martin<sup>1,\*</sup>, Steven James Reynolds<sup>2,3,4</sup>, Brian T. Foley<sup>5</sup>, Fred Nalugoda<sup>2</sup>, Thomas C. Quinn<sup>2,3,4</sup>, Steven A. Kemp<sup>6</sup>, Margaret Nakalanzi<sup>2</sup>, Edward Nelson Kankaka<sup>2</sup>, Godfrey Kigozi<sup>2</sup>, Robert Ssekubugu<sup>2</sup>, Ravindra K. Gupta<sup>6,7</sup>, Lucie Abeler-Dörner<sup>8</sup>, Joseph Kagaayi<sup>2,9</sup>, Oliver Ratmann<sup>10</sup>, Christophe Fraser<sup>8</sup>, Ronald Moses Galiwango<sup>2</sup>, David Bonsall<sup>11,†</sup>, M. Kate Grabowski<sup>1,2,12,†</sup>, on behalf of the PANGEA-HIV Consortium and the Rakai Health Sciences Program

<sup>1</sup>Department of Pathology, Johns Hopkins School of Medicine, Baltimore, MD, USA

<sup>2</sup>Rakai Health Sciences Program, Kalisizo, Uganda

<sup>3</sup>Division of Infectious Disease, Department of Medicine, Johns Hopkins School of Medicine, Baltimore, MD, USA

<sup>4</sup>Division of Intramural Research, National Institute of Allergy and Infectious Diseases, National Institutes of Health, Bethesda, MD, USA

<sup>5</sup>Theoretical Biology and Biophysics, Los Alamos National Laboratory, Los Alamos, New Mexico, USA

<sup>6</sup>Department of Medicine, University of Cambridge, Cambridge, UK

<sup>7</sup>Africa Health Research Institute, KwaZulu-Natal, South Africa

<sup>8</sup>Pandemic Sciences Institute, Nuffield Department of Medicine, University of Oxford, Oxford, UK

<sup>9</sup>Makerere University School of Public Health, Kampala, Uganda

<sup>10</sup>Department of Mathematics, Imperial College London, London, England, United Kingdom

<sup>11</sup>Wellcome Centre for Human Genetics, Nuffield Department of Medicine, University of Oxford, Oxford, UK

<sup>12</sup>Department of Epidemiology, Johns Hopkins Bloomberg School of Public Health, Baltimore, MD, USA

<sup>†</sup>These authors contributed equally

\*Corresponding author: [mmart108@jhmi.edu](mailto:mmart108@jhmi.edu)

1 **Abstract**

2 *Background*

3 Clinical studies have reported rising pre-treatment HIV drug resistance during antiretroviral  
4 treatment (ART) scale-up in Africa, but representative data are limited. We estimated  
5 population-level drug resistance trends during ART expansion in Uganda

6  
7 *Methods*

8 We analyzed data from the population-based open Rakai Community Cohort Study conducted at  
9 agrarian, trading, and fishing communities in southern Uganda between 2012 and 2019.  
10 Consenting participants aged 15-49 were HIV tested and completed questionnaires. Persons  
11 living with HIV (PLHIV) provided samples for viral load quantification and virus deep-  
12 sequencing. Sequence data were used to predict resistance. Population prevalence of class-  
13 specific resistance and resistance-conferring substitutions were estimated using robust log-  
14 Poisson regression.

15  
16 *Findings*

17 Data from 93,622 participant-visits, including 4,702 deep-sequencing measurements, showed  
18 that the prevalence of NNRTI resistance among pre-treatment viremic PLHIV doubled between  
19 2012 and 2017 (PR:1.98, 95%CI:1.34–2.91), rising to 9.61% (7.27-12.7%). The overall  
20 population prevalence of pre-treatment viremic NNRTI and NRTI resistance among all  
21 participants decreased during the same period, reaching 0.25% (0.18% - 0.33%) and 0.05%  
22 (0.02% - 0.10%), respectively ( $p$ -values for trend = 0.00015, 0.002), coincident with increasing  
23 treatment coverage and viral suppression. By the final survey, population prevalence of  
24 resistance contributed by treatment-experienced PLHIV exceeded that from pre-treatment  
25 PLHIV, with NNRTI resistance at 0.54% (0.44%-0.66%) and NRTI resistance at 0.42% (0.33%-  
26 0.53%). Overall, NNRTI and NRTI resistance was predominantly attributable to rtK103N and  
27 rtM184V. While 10.52% (7.97%-13.87%) and 9.95% (6.41%-15.43%) of viremic pre-treatment  
28 and treatment-experienced PLHIV harbored the inT97A mutation, no major dolutegravir  
29 resistance mutations were observed.

30  
31 *Interpretation*

32 Despite rising NNRTI resistance among pre-treatment PLHIV, overall population prevalence of  
33 pre-treatment resistance decreased due to treatment uptake. Most NNRTI and NRTI resistance is  
34 now contributed by treatment-experienced PLHIV. The high prevalence of mutations conferring  
35 resistance to components of current first-line ART regimens among PLHIV with viremia is  
36 potentially concerning.

37  
38 *Funding*

39 National Institutes of Health and the Gates Foundation

40

## 41 **Research in context**

### 42 *Evidence before the study*

43 We searched PubMed for studies matching the keywords “hiv” “resistance” “longitudinal”  
44 “cohort” “population” published since 2004 (the beginning of antiretroviral therapy (ART)  
45 availability in sub-Saharan Africa) and identified 50 studies. We excluded 34 studies not based  
46 in sub-Saharan Africa, five studies primarily concerned with infection with other pathogens (e.g.  
47 HBV, *M. tuberculosis*), two studies concerned with insulin resistance, one sequencing-methods  
48 paper, and one paper concerned with host susceptibility to HIV infection. The remaining seven  
49 studies were not population-based meaning that the study population was not all persons but e.g.  
50 people living with HIV enrolled in care at a given clinic. Population-based cohort are essential  
51 for monitoring HIV drug resistance in both treated and untreated individuals, including those  
52 people who may go undetected in clinical settings, capturing evolutionary dynamics of resistance  
53 in real-world conditions.

54

### 55 *Added value of this study*

56 We estimated the prevalence of drug resistance over five consecutive survey rounds of a  
57 population-based open-cohort study in southern Uganda between 2012 and 2019 during a period  
58 of intense treatment scale-up. We show that among the entire population regardless of HIV  
59 status, 0.8% and 0.5% of individuals harbor viremic resistance to non-nucleoside reverse  
60 transcriptase inhibitors (NNRTIs) and nucleoside-reverse transcriptase inhibitors (NRTIs),  
61 respectively, of which the majority is dual-class NNRTI/NRTI resistance. Despite a two-fold  
62 increase in the prevalence of NNRTI resistance among pre-treatment viremic PLHIV, the overall  
63 prevalence of pre-treatment viremic resistance in the entire population decreased by more than  
64 50% due to increased treatment initiation and population viral load suppression. The majority of  
65 resistance in recent survey rounds was contributed by treatment-experienced PLHIV. Among  
66 treatment-experienced viremic PLHIV, we observe a substantial burden of mutations that confer  
67 resistance to the NNRTI and NRTI components of dolutegravir and cabotegravir based regimens  
68 e.g. rtM184V (34%) rtY181C (15%), rtG190A (12%), rtK65R (12%), and rtK101E (9.5%). The  
69 integrase strand transfer inhibitor (INSTI) resistance mutation inT97A was observed in about a  
70 tenth of viremic PLHIV.

71

72 These results provide the first longitudinal population-based estimates of temporal trends in the  
73 prevalence of drug resistance during ART program expansion in a high-burden setting. Further,  
74 they provide critical insight into the landscape of prevalent drug resistance substitutions  
75 circulating in this population.

76

### 77 *Implications of all the available evidence*

78 Scale-up of HIV treatment has increased the prevalence of drug resistance mutations among  
79 viremic people living with HIV in sub-Saharan Africa. The relatively high prevalence of NNRTI  
80 resistance has prompted a recent shift to first-line regimens including dolutegravir (an INSTI) in  
81 combination with NRTIs. The high prevalence of mutations conferring resistance to components  
82 of current first-line regimens in our population warrants continued monitoring of treatment  
83 failures and the prevalence of drug resistance in high burden settings.

84

85

## 86 **Introduction**

87 Antiretroviral therapy (ART) suppresses human immunodeficiency virus (HIV) replication in  
88 persons living with HIV (PLHIV),<sup>1</sup> which slows disease progression<sup>2</sup> and prevents viral  
89 transmission.<sup>3</sup> With increased uptake of ART as well as other interventions such as voluntary  
90 medical male circumcision, HIV incidence has fallen by nearly 40% globally since 2010.<sup>4</sup>

91  
92 Viral resistance to ART threatens the clinical and public health impact of treatment scale-up<sup>5,6</sup>.  
93 Drug resistance can be acquired when an individual infected with a susceptible virus develops  
94 resistance following treatment. This is more common when treatment adherence is intermittent,<sup>7</sup>  
95 but can occur despite high adherence.<sup>8</sup> Throughout sub-Saharan Africa, the epicenter of the  
96 global HIV epidemic<sup>4</sup>, the majority of patients who remain viremic despite being on treatment  
97 with first-line regimens harbor resistance to at least one component of that regimen<sup>1</sup>. Viral  
98 genomes with resistance-conferring mutations can be transmitted to HIV seronegative  
99 individuals, increasing the risk of first-line treatment failure approximately five-fold.<sup>9</sup>

100  
101 Through 2018, preferred first-line HIV ART regimens relied on a combination of nucleoside  
102 reverse transcriptase inhibitors (NRTIs) and non-nucleoside reverse transcriptase inhibitor  
103 (NNRTI)<sup>10</sup>. During the scale-up of ART, an increase in the prevalence of NNRTI resistance  
104 among pre-treatment PLHIV has been observed globally<sup>11</sup>. A systematic meta-regression  
105 estimated a 1.3% annual increase in NNRTI resistance in eastern Africa, reaching 10% by 2016.  
106 These findings have been corroborated by recent cross-sectional studies and World Health  
107 Organization (WHO) surveys<sup>1,12,13</sup> and prompted a shift in recommendations to dolutegravir  
108 (DTG, an integrase strand transfer inhibitor [INSTI]) given in combination with NRTIs (e.g.  
109 Tenofovir disoproxil fumarate [TDF] and Lamivudine [3TC]) for first-line ART. Further, long-  
110 lasting injectable INSTIs (e.g. cabotegravir [CAB]) in combination with an NNRTI (rilpivirine  
111 [RPV]) are currently being rolled out throughout sub-Saharan Africa<sup>14</sup>.

112  
113 The vast majority of data on the prevalence of HIV ART resistance in sub-Saharan Africa is  
114 derived from the population of PLHIV who report to healthcare clinics or hospitals<sup>1,11-13</sup>. Clinic-  
115 based studies are subject to biases in the population of PLHIV who are engaged and retained in  
116 care, which is not universal<sup>15</sup>. Specifically in eastern and southern Africa, only 95% of women  
117 and 91% of men are aware of their HIV status and of those only 92% and 86% are on ART,  
118 respectively<sup>4</sup>. Further, clinic-based studies are able to estimate only the prevalence of ART  
119 resistance among PLHIV and not among the general population. The latter is the  
120 epidemiologically relevant parameter to inform the risk of exposure to HIV with ART resistance  
121 among seronegative individuals<sup>16</sup>.

122  
123 General population-based studies, in which all individuals, regardless of HIV serostatus, are  
124 recruited to participate, can address these shortcomings. This design also allows for the accurate  
125 estimation of the overall prevalence of resistance and the relative contributions from different  
126 groups, such as pre-treatment and treatment-experienced PLHIV. A recent cross-sectional  
127 population-based study of drug resistance in KwaZulu-Natal, South Africa found very low  
128 (<1%) levels of resistance to INSTIs prior to DTG roll-out, but observed rtM184V (3TC  
129 resistance), rtK65R (TDF resistance), and rtK70E (TDF resistance) in 32.6%, 12.0%, and 6.2%  
130 of treatment-experienced PLHIV. Further, the rtE138A mutation, which confers resistance to  
131 RPV, was observed in in 6.5% and 7.9% of ART-experienced and -naïve PLHIV, respectively,

132 in this setting<sup>17</sup>. Cross-sectional studies, however, are unable to assess temporal trends in the  
133 prevalence of resistance among PLHIV and the general population and do not capture the overall  
134 decrease in the prevalence of viremic HIV during ART scale-up. Conversely, longitudinal  
135 population-based cohort designs enable more precise monitoring of resistance evolution and a  
136 dynamic evaluation of the risks posed to current and future ART regimens. This study design is  
137 particularly useful in the context of rapidly changing population sizes of pre-treatment and  
138 treatment-experienced viremic PLHIV as has been observed globally in recent decades during  
139 expansion of treatment and prevention programs<sup>15</sup>.

140  
141 Here, we analyzed HIV deep-sequence data collected from 3,407 PLHIV as part of a general  
142 population-based open cohort study in southern Uganda spanning a nine-year period of intense  
143 ART scale-up and declines in HIV incidence<sup>18-20</sup>. Our validated deep-sequencing protocol<sup>21</sup>  
144 allows for the identification and quantification of drug resistance mutations present in a minority  
145 of the viral population within a given PLHIV, which can be selected for upon treatment initiation  
146 but are missed by consensus sequencing methods<sup>22-24</sup>. We estimated the prevalence of NNRTI,  
147 NRTI, and protease inhibitor (PI) resistance among the entire study population and among  
148 PLHIV as well as the temporal dynamics of viral resistance-conferring mutations among pre-  
149 treatment and treatment-experienced PLHIV.

## 150 151 **Methods**

### 152 *Study design and participant selection*

153 The Rakai Community Cohort Study (RCCS) is an open population-based census and cohort  
154 study conducted at approximately 18-24 month intervals (appendix pp 2-3) in agrarian (HIV  
155 prevalence 9-26%<sup>25</sup>), semi-urban trading (11-21%<sup>25</sup>), and Lake Victoria fishing (38-43%<sup>25</sup>)  
156 communities in southern Uganda.<sup>20</sup> At each survey round, households in participating  
157 communities are censused and residents aged 15-49 capable of providing informed written  
158 consent (or assent if under 18) are invited to participate. Consenting participants are administered  
159 a structured questionnaire that obtains sociodemographic, behavioral, and health information,  
160 including self-reported past and current ART use. Voluntary HIV testing of participants is  
161 conducted using a rapid test algorithm<sup>26</sup> and venous blood samples are taken for viral  
162 quantification and sequencing.

163  
164 The RCCS is administered by the Rakai Health Sciences Program (RHSP) and has received  
165 ethical approval from the Uganda Virus Research Institute's Research and Ethics Committee  
166 (HS540), the Uganda National Council for Science and Technology (GC/127/08/12/137), and the  
167 Johns Hopkins School of Medicine (IRB00217467). Participants provided written informed  
168 consent at each survey round.

169  
170 We used survey data from 19 RCCS surveys conducted between November 5, 1994 and  
171 November 4, 2020, and HIV viral load and sequence data from five rounds conducted between  
172 August 10, 2011 and November 4, 2020. Participants with serologically confirmed HIV infection  
173 were considered pre-treatment during a given round if they reported never having taken ARTs at  
174 that round and all prior rounds in which they participated. PLHIV were considered treatment-  
175 experienced during a given round if they reported using ART at that round or any earlier rounds.  
176 Recommended first-line ART regimens in RCCS communities are presented in appendix p 4.  
177 Herein, study rounds were referred to by the year of the median interview date (appendix p 2).

178  
179 Reporting of this study adheres to the STROBE guidance<sup>27</sup>.

180  
181 *HIV viral load quantification*  
182 HIV viral load was measured on serum/plasma samples using the Abbott real-time m2000 assay  
183 (Abbott Laboratories) at the Rakai health Sciences Program (Kalisizo, Uganda). Viral load  
184 measurements were conducted primarily among PLHIV in fishing communities in the 2012  
185 survey round and for all PLHIV in later survey rounds. Viral loads  $\geq 1000$  copies/mL were  
186 considered viremic. Pre-treatment PLHIV in the 2012 round with missing viral load were  
187 imputed (appendix pp 4-5). In the rare instance where viral load measurements were missing for  
188 PLHIV in subsequent survey rounds, these observations were dropped from the analysis.

189  
190 *HIV deep sequencing*  
191 Full-length HIV deep sequencing was conducted through the Phylogenetics and Networks for  
192 Generalized HIV Epidemics in Africa consortium (PANGEA-HIV).<sup>28,29</sup> As described  
193 elsewhere,<sup>19</sup> for the 2012 and 2014 surveys sequencing on Illumina MiSeq and HiSeq platforms  
194 using an amplicon-based approach<sup>30</sup> was attempted for participants who self-reported never  
195 having been on ART and either had a missing viral load or were known to be viremic (appendix  
196 p 21). All viremic participant-visits, regardless of treatment status, in the 2015 through 2019  
197 survey rounds, as well as select 2012 and 2014 participant-visits, were sequenced using the  
198 veSEQ-HIV protocol, which involves oligo-nucleotide bait enrichment of HIV from pooled  
199 metagenomic libraries prepared without virus-specific PCR.<sup>31</sup> Our high-throughput  
200 implementation of the veSEQ-HIV protocol incorporates quantitative positive controls consisting  
201 of a serial dilution HXB2 cultured virus diluted in pooled human plasma from donors testing  
202 negative for HIV, as well as negative plasma controls included with every batch of samples  
203 processed. Sequencing quality was monitored from total counts of HIV reads detected in the  
204 quantitative controls, their PCR duplication rates and median insert sizes. Where contaminations  
205 were detected either by the presence of HIV reads in the negative control, or HXB2 reads present  
206 in the samples, sequencing runs were repeated. Sequencing for the 2019 round was only  
207 conducted for samples collected through May 17, 2019 (N = 171/453, 37.7% of viremic  
208 participant visits). Consensus sequences were generated using shiver<sup>32</sup> and subtyped by  
209 identifying the most similar reference sequence and using the Recombination Identification  
210 Program.<sup>33</sup>

211  
212 *Identification of drug resistance mutations*  
213 A validated bioinformatic pipeline, drmSEQ, was used to identify amino acid substitutions  
214 associated with reduced susceptibility to ART and predict individual drug and drug class  
215 susceptibilities at the University of Oxford Nuffield Department of Medicine.<sup>34</sup> Paired-end reads  
216 were trimmed of adapters, primers, and low-quality bases with trimmomatic<sup>35</sup> and then filtered to  
217 remove *pol* hypermutated sequences and non-HIV *pol* sequences. Duplicate reads introduced by  
218 PCR were removed using Picard MarkDuplicates<sup>36</sup> and unique reads were locally aligned to 142  
219 HIV subtype references using blastx.<sup>37</sup> A manually-curated codon-restricted multiple-alignment  
220 of the references was used to lookup coordinates and mutations relative to HXB2 (GenBank:  
221 K03455.1). Only mutations supported by a minimum of 10 PCR-deduplicated reads and by  $\geq 5\%$   
222 of reads spanning the corresponding site were considered.<sup>38</sup> These thresholds are based on HIV  
223 read counts after removal of non-unique PCR duplicate reads. Importantly, the same thresholds

224 were used in a previous validation and demonstrated comparable sensitivity to a gold standard  
225 clinical assay<sup>34</sup>. Amino acid substitutions were scored according to the Stanford University HIV  
226 Drug Resistance Database. Scores were summed to predict susceptibility to 25 HIV drugs  
227 (appendix p 13).<sup>39-41</sup> A score  $\geq 30$  (intermediate/high-level) for a given drug was categorized as  
228 resistant. Resistance was not predicted if less than half of the relevant positions for a given drug  
229 had fewer than 10 reads. Samples in which there was insufficient sequencing coverage for one or  
230 more drug within a class were not assigned a resistance categorization for that class. Samples  
231 with resistance to at least one drug within each class were categorized as resistant to that class.

232

### 233 *Outcome measures*

234 The primary outcomes of this study were the prevalence of viremic PLHIV with INSTI, NNRTI,  
235 NRTI, and or PI resistance among all participants, regardless of HIV serostatus, in each survey  
236 round. We also estimated the population prevalence of NNRTI, NRTI, and PI resistance  
237 contributed by viremic pre-treatment and treatment-experienced PLHIV and the population  
238 prevalence of multi-class resistance. We further estimated the prevalence of NNRTI, NRTI, and  
239 PI resistance and individual resistance-conferring viral mutations specifically among viremic  
240 pre-treatment and treatment-experienced PLHIV in each survey round. Given the greater  
241 prevalence of viremic HIV in fishing communities, among men, and among younger age groups  
242 in the RCCS<sup>19,20,25</sup> we evaluated the association between these variables and resistance in  
243 bivariate analyses. Stratified estimates were generated for covariates identified as significant in  
244 bivariate analyses. Given the availability of sequence data, we restricted prevalence estimates  
245 that include treatment-experienced PLHIV to the 2015 and 2017 survey rounds and use the 2017  
246 survey as an end-point for pre-treatment PLHIV. For context, we estimated the prevalence of  
247 PLHIV, viremic PLHIV (2014 and later due to missing viral load data), viremic PLHIV pre-  
248 treatment, and viremic treatment-experienced PLHIV among participants in each round (2014  
249 and later).

250

### 251 *Statistical methods*

252 Statistical analyses were conducted in R v.4.4.1.<sup>42</sup> Prevalence was estimated using Poisson  
253 regression with a log-link and robust (sandwich) standard errors<sup>43</sup> which were fit with general  
254 estimating equations using geepack v.1.3.11 to account for repeated measures<sup>44</sup>. Correlation  
255 structures were chosen by minimizing the Quasi Information Criterion (QIC). We used inverse  
256 probability weighting to account for missing sequence data among viremic study participants.  
257 Sampling weights were calculated based on availability of a viral load measurement  
258 (True/False),  $\log_{10}$  copies/mL where available, community type (agrarian/fishing/trading), age  
259 category ((14,24]/(24,34]/(34,49]), and sex (M/F) stratified by survey round. Emmeans v. 1.10.4  
260 was used to calculate prevalence within strata<sup>45</sup>. 95% confidence intervals and  $p$ -values ( $\alpha =$   
261 0.05) were calculated using the Wald method.  $\chi^2$   $p$ -values were calculated using the stats  
262 package in R. Data analysis and visualization was done using tidyverse v.2.0.0,<sup>46</sup> ggplot2  
263 v.3.5.1,<sup>47</sup> cowplot v.1.1.3,<sup>48</sup> patchwork v. 1.2.0<sup>49</sup>, and ggpattern v.1.1.1<sup>50</sup>. Readxl v.1.4.3<sup>51</sup> and  
264 haven v.2.5.4.9<sup>52</sup> were used to parse data files. See appendix pp 5-17 for detailed methods.

265

### 266 *Role of the funding source*

267 The funders had no role in study design, collection, analysis, and interpretation of data; and no  
268 role in the writing of the report and decision to publish.

269

270 **Results**

271 ***Study population***

272 Between August 10, 2011 and November 4, 2020, a total of 43,361 people participated in the  
273 RCCS, of whom 7,923 (18.27%) were PLHIV. Of 93,622 participant-visits about a fifth were  
274 from PLHIV (table 1). Over the analysis period, the median age of study participants remained  
275 stable whereas the age of PLHIV increased slightly (appendix pp 18-19). Viral load  
276 measurements were available for 1,959/3,498 (56.00%) of PLHIV in the 2012 survey and  
277 13,962/14,008 (99.67%) PLHIV in later survey rounds. A total of 46 participant-visits from the  
278 2014-2019 surveys with missing viral loads were dropped from subsequent analyses. Among  
279 participant-visits from PLHIV in 2014-2019, 26.29% were contributed by viremic PLHIV and of  
280 those 79.81% were pre-treatment viremic. After imputation of missing viral loads (*Methods*),  
281 56.75% of PLHIV in the 2012 survey were identified as pre-treatment viremic.

282  
283 HIV seroprevalence among participants decreased from 20.38% (95% CI 19.78% - 20.99%) in  
284 the 2012 survey to 17.20% (95% CI 16.68% - 17.74%) in the 2019 survey (figure 1A, appendix  
285 p 20). Concurrent with an increase in the proportion of PLHIV reporting ever having been on  
286 treatment from 25.04% (2012) to 85.25% (2019, appendix p 21), HIV viremia among all  
287 participants decreased significantly from 8.14% (2014, 95% CI 7.75% - 8.55%) to 2.34% (2019,  
288 95% CI 2.14% - 2.57%). These declines were driven by a nearly nine-fold (prevalence ratio (PR)  
289 0.13, 95% CI 0.11 – 0.15) decrease in the prevalence of pre-treatment viremia among  
290 participants over the study (figure 1A, appendix p 20). The prevalence of treatment-experienced  
291 viremia remained stable at around 1% of participants.

292



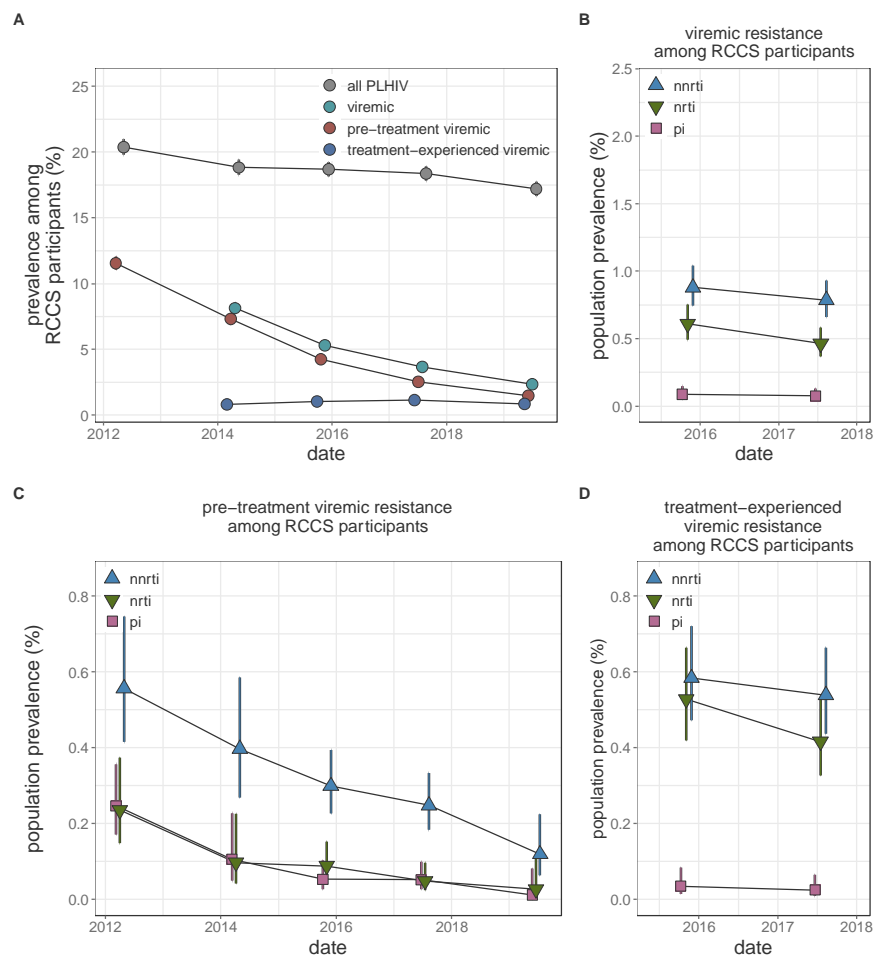

293  
 294 **Figure 1: Longitudinal trends in HIV seroprevalence and population prevalence of viremic HIV drug**  
 295 **resistance among Rakai Community Cohort Study participants, 2012-2019.** (A) Estimated prevalence of all  
 296 HIV, viremic HIV, viremic pre-treatment HIV, and viremic treatment-experienced HIV in each round. Due to  
 297 missing viral load data, prevalence of viremic HIV and viremic treatment-experienced HIV were not estimated in  
 298 the 2012 survey. For some estimates confidence bands do not extend beyond point. (B-D) Estimated population  
 299 prevalence of all viremic (B), pre-treatment viremic (C), and treatment-experienced viremic (D) NNRTI, NRTI, and  
 300 PI resistance among all study participants. Estimates were generated using Poisson regression with robust standard  
 301 errors with survey round as a predictor variable. Generalized estimating equations with correlation structure  
 302 selection by Quasi Information Criterion value (A: independent, B: independent, C: independent, D: exchangeable  
 303 (NNRTI and PI), independent (NRTI)) were used to account for repeat participants across study rounds. Error bars  
 304 indicate the Wald 95% confidence interval for the mean value. For clarity, points are jittered along the x-axis.  
 305 PLHIV = people living with HIV. NNRTI = non-nucleoside reverse transcriptase inhibitors (blue upwards facing  
 306 triangles). NRTI = nucleoside reverse transcriptase inhibitors (green downwards facing triangles). PI = integrase  
 307 inhibitors (pink squares).  
 308

309 ***Identification of resistance genotypes in deep-sequence data***

310 Deep-sequence based identification of drug resistance mutations (DRMs) was attempted on  
 311 4,525/5,724 (79.51%) of viremic participant visits (appendix p 22). Attempted genotyping did  
 312 not vary by participant age, sex, or community type of residence. The veSeq-HIV sequencing  
 313 protocol was used for 44.99% of all sequenced viremic participants and the vast majority  
 314 (99.37%) of those in the 2015 through 2019 survey rounds (appendix p 23). Among samples  
 315 from viremic participant-visits on which deep-sequence based genotyping was attempted,

316 sufficient data were available to reliably genotype 4,072/4,525 (90.01%, appendix pp 24-25)  
317 viruses from 3,407 PLHIV for at least one drug. Sequencing success did not depend on age,  
318 community, type or sex, ( $p$ -values  $\geq 0.37$ ) but was more likely among samples with higher viral  
319 load and those sequenced with veSeq-HIV ( $p$ -values = 0.0005). Among sequenced participant-  
320 visits successfully genotyped for all INSTIs ( $n=2,578$ , appendix pp 26-32), NNRTIs ( $n=3,050$ ),  
321 NRTIs ( $n=3,009$ ) or PIs ( $n=3,520$ )  $<1\%$ , 12.46%, 6.75%, and 1.88% had predicted resistance,  
322 respectively (appendix pp 33-34). Given the minimal INSTI resistance we did not estimate the  
323 prevalence of INSTI resistance.

324

### 325 *Population prevalence of viremic resistance*

326 In 2017, the population prevalence of viremic NNRTI, NRTI, and PI resistance among all  
327 participants, regardless of HIV serostatus, was 0.79% (95% CI 0.66% - 0.93%), 0.46% (95% CI  
328 0.37% - 0.58%), and 0.08% (95% CI 0.04% - 0.13%), respectively. These levels were stable  
329 compared to 2015 (figure 1B, appendix p 35). In stratified analyses, NNRTI and NRTI resistance  
330 was more than three-times as common in fishing as compared to agrarian or trading communities  
331 and most prevalent among people aged 25-34 years old ( $p$ -values  $\leq 0.0001$ , appendix pp 36-38).

332

333 The prevalence of NNRTI and NRTI resistance contributed by pre-treatment viremic PLHIV  
334 decreased 2.3-fold (PR 0.44, 95% CI 0.29 - 0.68) and 5-fold (PR 0.21, 95% CI 0.09 - 0.47)  
335 between the 2012 and 2017 surveys ( $p$ -values  $< 0.0001$ , figure 1C, appendix p 38), concurrent  
336 with the observed decline in population prevalence of pre-treatment viremia. Consequently, in  
337 the 2017 survey round, treatment-experienced viremic PLHIV contributed 68.46% (95% CI  
338 59.49% - 75.44%) and 89.61% (79.92% - 94.62%) of all NNRTI and NRTI resistance,  
339 respectively. Specifically, the population prevalence of resistance to NNRTIs and NRTIs  
340 contributed by treatment-experienced viremic PLHIV in the 2017 survey was 0.54%, 95% CI  
341 0.44%-0.66% and 0.42%, 0.33%-0.53% as compared to 0.25%, 0.18%-0.32% and 0.05%,  
342 0.02%-0.1% (appendix pp 39 - 40) contributed by pre-treatment viremic PLHIV.

343

344 Resistance profiles varied considerably by treatment status (figure 2 and appendix p 41). Among  
345 pre-treatment viremic PLHIV with available genotype for NNRTIs, NRTI, and PIs the majority  
346 with any resistance were NNRTI mono-resistant (2017 survey  $n=35$ , 70%). In contrast, among  
347 treatment-experienced viremic PLHIV with any resistance, NNRTI/NRTI dual-class resistance  
348 was the most common profile (2017 survey  $n=64$ , 73.56%). Among all participants, the most  
349 common forms of viremic resistance were NNRTI/NRTI dual-class resistance (2017: 0.44%,  
350 95% CI 0.35% - 0.56%) and NNRTI mono-resistance (2017: 0.32%, 95% CI 0.25% - 0.42%),  
351 consistent with a dominant contribution from treatment-experienced viremic PLHIV.  
352 Other resistance profiles were extremely rare ( $<0.1\%$ ).

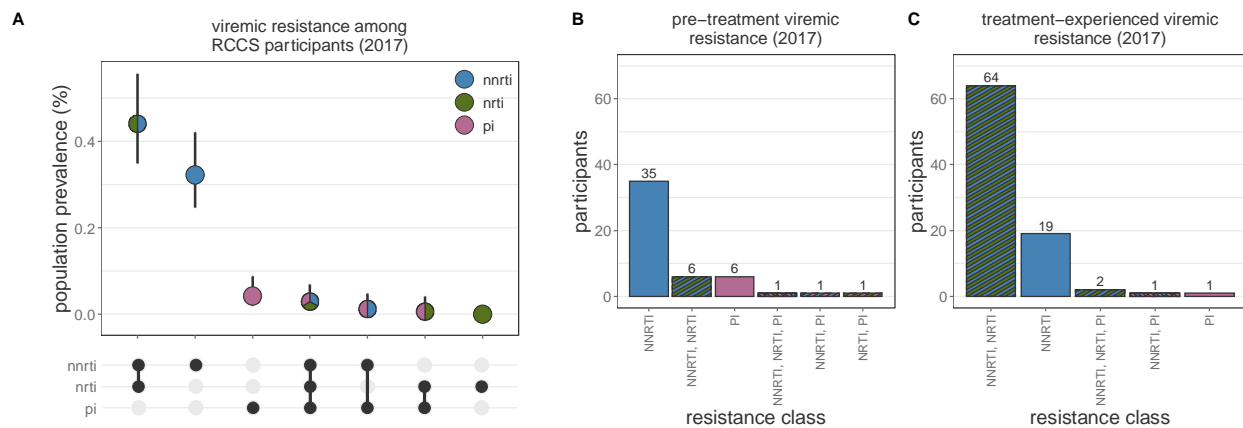

353  
354 **Figure 2: Patterns of multi-class resistance in Rakai Community Cohort Study, 2017.** (A) Estimating  
355 population prevalence of NNRTI, NRTI, and PI mono-resistance and NNRTI/NRTI, NNRTI/PI, NRTI/PI, and  
356 NNRTI/NRTI/PI multi-class resistance among all RCCS study participants. Estimates were generated using Poisson  
357 regression with robust standard errors with survey round as a predictor variable. General estimating equations with  
358 the best fit correlation structure by QIC value (NNRTI, NRTI, PI mono-resistance and NNRTI/NRTI and NNRTI/PI  
359 multi-class resistance: independent, NRTI/PI and NNRTI/NRTI/PI: exchangeable) were used to account for repeated  
360 measures from the same participant. Error bars indicate the Wald 95% confidence interval for the mean value. (B)  
361 Multi-class resistance profiles among 50 pre-treatment viremic 2017 participant-visits with genotype data for all  
362 NNRTIs, NRTIs, PIs, and resistance to at least one of these drug classes. (C) Multi-class resistance profiles among  
363 87 treatment-experienced viremic 2017 participant-visits with genotype data for all NNRTIs, NRTIs, PIs, and  
364 resistance to at least one of these drug classes. NNRTI = non-nucleoside reverse transcriptase inhibitors. NRTI =  
365 nucleoside reverse transcriptase inhibitors. PI = integrase inhibitors.

366  
367 *Prevalence of resistance among pre-treatment viremic PLHIV*

368 Between the 2012 and 2017, NNRTI resistance among pre-treatment viremic PLHIV increased  
369 by a factor of 1.98 (95% CI: 1.34-2.91), reaching 9.61% (95% CI: 7.27% - 12.7%) (figure 1A  
370 and appendix pp 42). This increasing trend did not vary by sex, age, type of community of  
371 residence, or sequencing approach (appendix pp 43-44). The prevalence of NRTI and PI  
372 resistance remained stable and below 2.1% over the same time period.

373

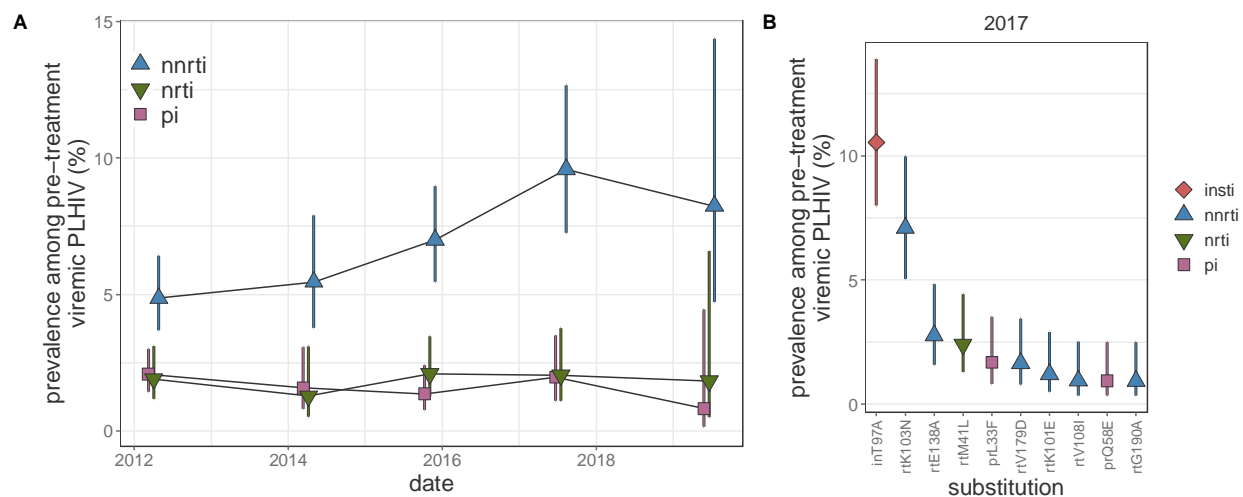

374  
375 **Figure 3: Longitudinal trends in HIV drug resistance among pre-treatment viremic Rakai Community**  
376 **Cohort Study participants, 2012-2019.** (A) Estimated prevalence of NNRTI, NRTI, and PI resistance among pre-  
377 treatment viremic PLHIV. For visual clarity, points are jittered along the x-axis. (B) Prevalence in the 2017 survey  
378 of the 10 most prevalent substitutions in pre-treatment viremic PLHIV sorted by prevalence. Estimates were

379 generated using Poisson regression with robust standard errors with survey round as a predictor variable. General  
380 estimating equations with the best fit correlation structure by QIC value (NNRTI: exchangeable, NRTI:  
381 exchangeable, PI: AR1, substitutions: independent to ensure convergence) were used to account for repeated  
382 measures from the same participant. Error bars indicate the Wald 95% confidence interval for the mean value within  
383 each category. PLHIV = people living with HIV. NNRTI = non-nucleoside reverse transcriptase inhibitors. NRTI =  
384 nucleoside reverse transcriptase inhibitors. PI = integrase inhibitors.

385  
386 Among pre-treatment viremic PLHIV, the most prevalent resistance-associated mutation was  
387 inT97A (figure 3B and appendix pp 46-48), an INSTI-resistance (particularly Elvitegravir<sup>53</sup>)  
388 mutation, detected in ~10% of pre-treatment viremic participants in the 2012 through 2017  
389 survey rounds and in 20% (95% CI 13.89% - 28.8%) in the partial 2019 survey data. The most  
390 common NNRTI-resistance mutation was rtK103N, found in 7.1% (95% CI 5.05% - 9.97%) of  
391 pre-treatment viremic PLHIV in the 2017 survey, a 4.26-fold (95% CI 2.11 - 8.59) increase  
392 compared to the 2012 survey. The next most prevalent NNRTI mutation, rtE138A, which is  
393 associated with 2.5-fold reduced susceptibility to RPV<sup>54</sup>, was present in only 2.77% (95% CI  
394 1.59% - 4.85%) of pre-treatment viremic PLHIV and its prevalence remained stable compared to  
395 the 2012 survey ( $p$ -value = 0.49). NRTI resistance mutations were rare compared to NNRTI  
396 mutations. Genotypes associated with intermediate/high-level INSTI resistance were identified in  
397 16 pre-treatment viremic participant-visits (<1%), the majority of which harbored inE92G  
398 ( $n=13$ ), which confers resistance to Elvitegravir, a drug that is not routinely used in Uganda  
399 (appendix p 4). Mutations conferring intermediate/high-level resistance to DTG were not  
400 observed.

401  
402 *Prevalence of resistance among treatment-experienced viremic PLHIV*  
403 Prevalence of NNRTI and NRTI resistance was substantially higher among treatment-  
404 experienced participants as compared to pre-treatment PLHIV. In 2017, 51.49% (95 CI 46.24%-  
405 57.34%) and 36.46% (95% CI 30.06%-44.22%) of treatment-experienced participants with  
406 viremia harbored NNRTI and NRTI resistant viruses, respectively (figure 4A and appendix p  
407 49). NRTI resistance was 1.62 (95% CI 1.03 - 2.56, appendix pp 50-51) times more common  
408 among participants aged 25-34 years compared to 15-24 year-olds ( $p$ -value = 0.037). While  
409 NNRTI resistance remained stable between the 2015 and 2017 survey rounds, NRTI resistance  
410 decreased by more than quarter (prevalence ratio 0.73%, 95% CI 0.58 - 0.92,  $p$ -value = 0.0084).  
411 Only 2.13% (95% CI 0.81%-5.63%) of treatment-experienced viremic participants in the 2017  
412 survey round had viruses with PI resistance.

413

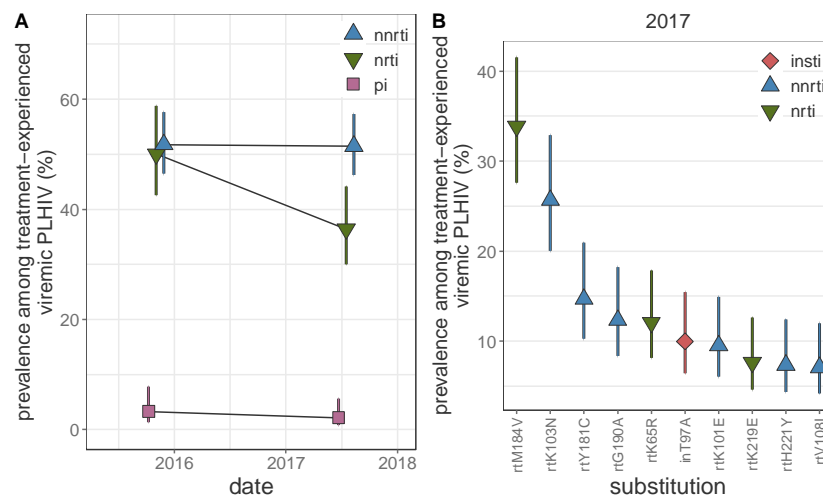

414  
 415 **Figure 4: Longitudinal trends in HIV drug resistance among treatment-experienced viremic Rakai**  
 416 **Community Cohort Study participants, 2015-2017.** (A) Estimated prevalence of NNRTI, NRTI, and PI resistance  
 417 among treatment-experienced viremic PLHIV. For visual clarity, points are jittered along the x-axis. (C) Prevalence  
 418 of the 10 most prevalent drug resistance mutations in treatment-experienced viremic PLHIV in the 2017 survey  
 419 round, sorted by prevalence. Estimates were generated using Poisson regression with robust standard errors with  
 420 survey round as a predictor variable. General estimating equations with the best fit correlation structure by QIC  
 421 value (NNRTI and PI: exchangeable, NRTI: independent, mutations: independent to ensure convergence) were used  
 422 to account for repeated measures from the same participant. Error bars indicate the Wald 95% confidence interval  
 423 for the mean value within each category. PLHIV = people living with HIV. NNRTI = non-nucleoside reverse  
 424 transcriptase inhibitors. NRTI = nucleoside reverse transcriptase inhibitors. PI = integrase inhibitors.

425  
 426 The resistance-associated mutations observed among treatment-experienced viremic participants  
 427 differed considerably compared to pre-treatment viremic participants (appendix pp 46, 52).  
 428 NRTI resistance among treatment-experienced viremic participants in the 2017 survey was most  
 429 frequently due to the rtM184V (33.89%, 95% CI 27.61% - 41.59%), rtK65R (12.07% 95% CI  
 430 8.14% - 17.9%), and rtK219E (7.64%, 95% CI 4.6% - 12.67%) substitutions, which were rarely  
 431 observed among pre-treatment PLHIV. On the contrary, the most prevalent NNRTI-associated  
 432 substitution among treatment-experienced viremic participants was rtK103N (25.68%, 95% CI  
 433 20.03 - 32.92%), however rtY181C (14.67%, 95% CI 10.27% - 20.95%) and rtG190A (12.34%,  
 434 95% CI 8.33% - 18.27%) were also frequently observed. inT97A was observed at a similar  
 435 prevalence as among pre-treatment viremic participants (9.96%, 95% CI 6.41 - 15.48%). Only  
 436 four participant-visits contributed by viremic treatment-experienced PLHIV (<1%) harbored  
 437 INSTI resistance mutations, which were each observed only once (inG163K, inG163R,  
 438 inR263K, inS147G) and not associated with DTG resistance.

439  
 440 **Discussion**  
 441 In this study, we report on trends in HIV drug resistance from a longitudinal, population-based  
 442 cohort in southern Uganda between 2012 and 2019, a period marked by the substantial expansion  
 443 of ART programs. Despite a doubling in the prevalence of NNRTI resistance among pre-  
 444 treatment PLHIV, we observed an overall decline in the population prevalence of pre-treatment  
 445 HIV drug-resistant viremia, alongside increasing ART uptake and viral suppression among  
 446 PLHIV. By the end of the analysis period, the population prevalence of NNRTI resistance was  
 447 0.78% and NRTI resistance was 0.46%, with most resistance stemming from dual-class  
 448 NNRTI/NRTI resistance in treatment-experienced viremic individuals. Notably, dual-class  
 449 resistance remained relatively uncommon among pre-treatment viremic PLHIV, and resistance

450 trends for NRTIs and PIs in this group remained stable throughout the ART scale-up, despite a  
451 substantial burden of NRTI resistance in treatment-experienced individuals. We also observed a  
452 relatively high background prevalence of the INSTI-resistance mutation inT97A. Overall, these  
453 findings provide important insights into the evolving dynamics of HIV drug resistance during  
454 ART scale-up in a high-burden East African population and may help guide future surveillance  
455 and HIV epidemic control efforts in the region.

456  
457 Consistent with previous studies, we observed an increase in the prevalence of NNRTI resistance  
458 among viremic pre-treatment individuals living with HIV, supporting the recent shift to DTG-  
459 based regimens<sup>1,11,12</sup>. However, a key finding of this population-based analysis is that, concurrent  
460 with this rise in NNRTI resistance, we observed a substantial decline in the overall population  
461 prevalence of pre-treatment HIV, likely driven by both increased treatment initiation and  
462 declining HIV incidence<sup>18-20</sup>. Importantly, this decrease in pre-treatment HIV has outpaced the  
463 rise in NNRTI resistance, resulting in a more than 50% reduction in the population prevalence of  
464 pre-treatment HIV with NNRTI resistance over the study period. By the end of the survey  
465 period, most viremic individuals with NNRTI-resistant HIV were those with prior treatment  
466 experience.

467  
468 We also find a lower burden of NNRTI and NRTI resistance among viremic treatment-  
469 experienced PLHIV in this study as compared to clinic-based studies<sup>1,12</sup>. This is likely because  
470 our population-based study design includes PLHIV who remain viremic because they are not  
471 actively engaged in care, despite past treatment exposure. In comparison, clinic-based studies  
472 may disproportionately enroll people who remain viremic due to sub-optimal adherence or are in  
473 more advanced stages of disease, and thus more likely to have drug resistance, whereas  
474 population-based sampling includes people lost to clinic-based care and no longer using  
475 treatment altogether.

476  
477 Both NNRTI and NRTI therapies remain important components of the current and future ART  
478 landscape. Current first-line DTG-regimens incorporate two NRTIs (e.g. TDF and 3TC) and  
479 DTG treatment failure is more likely among those with NRTI resistance<sup>55,56</sup>. We here observe  
480 rtM184V (>1000-fold reduced susceptibility to 3TC<sup>57</sup>) and rtK65R (five-fold reduced  
481 susceptibility to TDF<sup>58</sup>) in 34% and 12% of viremic treatment-experienced PLHIV. In contrast,  
482 these mutations were observed only rarely among pre-treatment PLHIV. Further, we identify a  
483 number of mutations associated with reduced susceptibility to the RPV (e.g. rtK101E, rtE138A,  
484 rtY181C, and rtG190A), an NNRTI given in combination with CAB as part of long-lasting  
485 injectable therapies, in 10-12% of viremic treatment-experienced PLHIV.

486  
487 As this study pre-dates the scale-up of DTG, we do not observe major DTG resistance-conferring  
488 mutations. Approximately 10% of viremic participants harbored inT97A, which is a polymorphic  
489 mutation most common in subtype A and in isolation confers two-fold resistance to EVG but not  
490 to other INSTIs<sup>59</sup>. The observed prevalence of inT97A in this study is an order of magnitude  
491 higher than in a population-based cohort in South Africa<sup>17</sup> and about twice as prevalence as  
492 globally-sampled INSTI-naïve PLHIV<sup>59</sup>. Further, we observe a significant increase in the  
493 prevalence of inT97A among pre-treatment viremic PLHIV in the 2019 survey round. As  
494 inT97A is repeatedly selected for in subjects failing DTG therapy<sup>60</sup> and in combination with

495 other mutations (e.g. inG140S and inQ148H) can significantly increase DTG resistance<sup>61-63</sup>, we  
496 recommend continued monitoring.

497  
498 There are important limitations of this work. Due to unknown HIV serostatus among non-  
499 participating residents of RCCS communities, we did not generalize our results beyond study  
500 participants. Younger individuals, men, and residents of trading communities are less likely to  
501 participate in RCCS surveys.<sup>20</sup> Further, only self-reported treatment status was available, which  
502 may have led to the misclassification of some participants. Prior work in this cohort  
503 demonstrated that 11% of self-reported ART-naïve participants had antivirals in their blood.<sup>64</sup>  
504 Given the significant differences observed in the mutational profiles of pre-treatment as  
505 compared to treatment-experienced PLHIV and the consistency of these results with estimates of  
506 the fitness impact of mutations in the absence of treatment,<sup>65</sup> we expect minimal  
507 misclassification bias. While we lack data on individual-level ART regimens, first-line therapy in  
508 this setting is highly consistent across individuals. As this work is based on sequencing of viral  
509 RNA, we could only identify resistance among viremic PLHIV. Consequently, our population  
510 prevalence estimates are an underestimate as some PLHIV with resistance may be suppressed  
511 through second-line therapy or were transiently suppressed following treatment initiation. The  
512 latter may be more pronounced in recent survey rounds as treatment scale-up has increased the  
513 proportion of recent treatment initiators.

514  
515 Despite the population-based study design, viral load data and sequence data was available for  
516 only a subset of participants due to budgetary and logistical constraints. We consequently restrict  
517 analyses to survey rounds where sufficient data is available to generate reliable inferences and  
518 use imputation to account for missing viral load data. Despite this missingness, deep-sequence  
519 data was available for 4,072 participant-visits, which is considerably more than a recent  
520 population-based study in South Africa ( $n=1,097$ ),<sup>17</sup> clinic-based studies in sub-Saharan Africa  
521 ( $n=972$ ),<sup>12</sup> and WHO surveys in Uganda ( $n=372$ )<sup>1</sup>. Further, we utilized detailed demographic  
522 data on survey participants to account for the role of potential biases in sequence data  
523 availability. However, we cannot rule out potential residual biases in our estimates.

524  
525 In summary, this study adds critical context to our understanding of the HIV epidemic in  
526 southern Uganda and to the impact of treatment expansion on the population burden of HIV  
527 resistance. We show that following ART scale-up, most resistance is contributed by treatment-  
528 experienced PLHIV, which may inform interventions aimed at reducing transmitted HIV  
529 resistance. The relatively high prevalence of NRTI and NRTI-resistance among treatment-  
530 experienced PLHIV and of inT97A among all viremic PLHIV is concerning in light of the roll-  
531 out of DTG+ TDF+3TC and CAB+RPV regimens in sub-Saharan Africa. Overall, these findings  
532 stress the importance of continued viral sequence-based monitoring of resistance mutations  
533 among PLHIV, particularly those with previous treatment exposure, during the roll-out of novel  
534 HIV ART regimens.

### 535 536 **Acknowledgements**

537 We thank the Rakai Health Sciences Program and the participants of the Rakai Community  
538 Cohort Study for making this research possible. We thank members of the PANGEA-HIV  
539 consortium, the Johns Hopkins University Infectious Disease Dynamics group, and the NIAID  
540 Laboratory of Immunoregulation International HIV/STD Section at the Johns Hopkins

541 University School of Medicine for helpful feedback on this work. This work was supported by  
542 the National Institutes of Health (NIH) National Institute of Allergy and Infectious Diseases  
543 (NIAID) (U01AI075115, R01AI087409, U01AI100031, R01AI110324, R01AI114438,  
544 K25AI114461, R01AI123002, K01AI125086, R01AI128779, R01AI143333, R21AI145682,  
545 R01AI155080, ZIAAI001040), NIH National Institute of Child Health and Development  
546 (R01HD050180, R01HD070769, R01HD091003), NIH National Heart, Lung, and Blood  
547 Institute (R01HL152813), the Fogarty International Center (D43TW009578, D43TW010557),  
548 the Johns Hopkins University Center for AIDS Research (P30AI094189), the Bill & Melinda  
549 Gates Foundation (OPP1084362, INV-007573, INV-035619, INV-060259, INV-075093), the  
550 U.S. President's Emergency Plan for AIDS Relief through the Centers for Disease Control and  
551 Prevention (NU2GGH000817), and in part by the Division of Intramural Research, NIAID,  
552 NIH.

553

#### 554 **Data sharing**

555 Code to reproduce all analyses and visualizations as well as de-identified resistance and limited  
556 patient metadata are available at [https://github.com/m-a-martin/rccs\\_hiv\\_resistance\\_r15\\_r19](https://github.com/m-a-martin/rccs_hiv_resistance_r15_r19).  
557 Due to privacy concerns we are unable to share individual-level data on community of residence.

558

#### 559 **Declaration of interests**

560 We declare no competing interests.

561

#### 562 **Contributors**

563 M.A.M.: Conceptualization, data curation, formal analysis, methodology, project administration,  
564 validation, visualization, writing – original draft, writing – review & editing

565 S.J.R.: Conceptualization, investigation, funding acquisition, resources, writing – review &  
566 editing

567 C.S.: Investigation, writing – review & editing

568 B.T.F.: Data curation, investigation, formal analysis, software, writing – review & editing

569 F.N.: Investigation, writing – review & editing

570 T.C.Q.: Conceptualization, funding acquisition, investigation, resources, writing – review &  
571 editing

572 S.A.K.: Conceptualization, writing – review & editing

573 M.N.: Investigation, writing – review & editing

574 E.N.K.: Investigation, writing – review & editing

575 G.K.: Investigation, writing – review & editing

576 R.S.: Investigation, writing – review & editing

577 R.K.G.: Conceptualization, writing – review & editing

578 L.A.D.: Funding acquisition, resources, writing – review & editing

579 J.K.: Conceptualization, investigation, funding acquisition, resources, writing – review & editing

580 O.R.: Conceptualization, funding acquisition, investigation, writing – review & editing

581 C.F.: Conceptualization, funding acquisition, investigation, writing – review & editing

582 R.M.G.: Conceptualization, investigation, writing – review & editing

583 D.B.: Conceptualization, data curation, formal analysis, funding acquisition, investigation,  
584 methodology, project administration, resources, software, supervision, writing – review &  
585 editing



586 M.K.G.: Conceptualization, data curation, formal analysis, funding acquisition, investigation,  
587 project administration, resources, supervision, writing – original draft, writing – review & editing  
588

## 589 **References**

- 590 1 HIV Drug Resistance Report 2021. Geneva: World Health Organization, 2021.
- 591 2 Trickey A, Sabin CA, Burkholder G, *et al.* Life expectancy after 2015 of adults with HIV on  
592 long-term antiretroviral therapy in Europe and North America: a collaborative analysis of  
593 cohort studies. *Lancet HIV* 2023; **10**: e295–307.
- 594 3 Cohen MS, Chen YQ, McCauley M, *et al.* Antiretroviral Therapy for the Prevention of HIV-1  
595 Transmission. *N Engl J Med* 2016; **375**: 830–9.
- 596 4 UNAIDS. AIDSinfo. <https://aidsinfo.unaids.org>.
- 597 5 Carr A, Mackie NE, Paredes R, Ruxrungtham K. HIV drug resistance in the era of  
598 contemporary antiretroviral therapy: A clinical perspective. *Antivir Ther* 2023; **28**:  
599 13596535231201162.
- 600 6 Phillips AN, Stover J, Cambiano V, *et al.* Impact of HIV Drug Resistance on HIV/AIDS-  
601 Associated Mortality, New Infections, and Antiretroviral Therapy Program Costs in Sub-  
602 Saharan Africa. *J Infect Dis* 2017; **215**: 1362–5.
- 603 7 Sethi AK, Celentano DD, Gange SJ, Moore RD, Gallant JE. Association between Adherence  
604 to Antiretroviral Therapy and Human Immunodeficiency Virus Drug Resistance. *Clin Infect*  
605 *Dis* 2003; **37**: 1112–8.
- 606 8 Bangsberg DR, Charlebois ED, Grant RM, *et al.* High levels of adherence do not prevent  
607 accumulation of HIV drug resistance mutations: *AIDS* 2003; **17**: 1925–32.
- 608 9 Beck IA, Levine M, McGrath CJ, *et al.* Pre-treatment HIV-drug resistance associated with  
609 virologic outcome of first-line NNRTI-antiretroviral therapy: A cohort study in Kenya.  
610 *eClinicalMedicine* 2020; **18**: 100239.
- 611 10 Updated recommendations on first-line and second-line antiretroviral regimens and post-  
612 exposure prophylaxis and recommendations on early infant diagnosis of HIV: interim  
613 guidelines. Supplement to the 2016 consolidated guidelines on the use of antiretroviral drugs  
614 for treating and preventing HIV infection. Geneva: World Health Organization, 2018.
- 615 11 Gupta RK, Gregson J, Parkin N, *et al.* HIV-1 drug resistance before initiation or re-initiation  
616 of first-line antiretroviral therapy in low-income and middle-income countries: a systematic  
617 review and meta-regression analysis. *Lancet Infect Dis* 2018; **18**: 346–55.
- 618 12 Crowell TA, Danboise B, Parikh A, *et al.* Pretreatment and Acquired Antiretroviral Drug  
619 Resistance Among Persons Living With HIV in Four African Countries. *Clin Infect Dis* 2021;  
620 **73**: e2311–22.

- 621 13Ntamatungiro AJ, Kagura J, Weisser M, Francis JM. Pre-treatment HIV-1 drug resistance in  
622 antiretroviral therapy-naive adults in Eastern Africa: a systematic review and meta-analysis. *J*  
623 *Antimicrob Chemother* 2022; **77**: 3231–41.
- 624 14Margolis DA, Gonzalez-Garcia J, Stellbrink H-J, *et al.* Long-acting intramuscular  
625 cabotegravir and rilpivirine in adults with HIV-1 infection (LATTE-2): 96-week results of a  
626 randomised, open-label, phase 2b, non-inferiority trial. *The Lancet* 2017; **390**: 1499–510.
- 627 15The path that ends AIDS: UNAIDS Global AIDS Update 2023. Geneva: Joint United Nations  
628 Programme on HIV/AIDS, 2023.
- 629 16Anderson RM, May RM. Infectious diseases of humans: dynamics and control. Oxford□;  
630 New York: Oxford University Press, 1991.
- 631 17Kemp SA, Kamelian K, Cuadros DF, *et al.* HIV transmission dynamics and population-wide  
632 drug resistance in rural South Africa. *Nat Commun* 2024; **15**: 3644.
- 633 18Kagaayi J, Chang LW, Ssempijja V, *et al.* Impact of combination HIV interventions on HIV  
634 incidence in hyperendemic fishing communities in Uganda: a prospective cohort study. *Lancet*  
635 *HIV* 2019; **6**: e680–7.
- 636 19Monod M, Brizzi A, Ssekubugu R, *et al.* Growing gender disparity in HIV infection in Africa:  
637 sources and policy implications. .
- 638 20Grabowski MK, Serwadda DM, Gray RH, *et al.* HIV Prevention Efforts and Incidence of HIV  
639 in Uganda. *N Engl J Med* 2017; **377**: 2154–66.
- 640 21Fogel JM, Wilson EA, Piwowar□Manning E, *et al.* HIV drug resistance in a  
641 community□randomized trial of universal testing and treatment: HPTN 071 (PopART). *J Int*  
642 *AIDS Soc* 2022; **25**. DOI:10.1002/jia2.25941.
- 643 22Chabria SB, Gupta S, Kozal MJ. Deep Sequencing of HIV: Clinical and Research  
644 Applications. *Annu. Rev. Genomics Hum. Genet.* 2014; **15**: 295–325.
- 645 23Li JZ, Paredes R, Ribaldo HJ, *et al.* Low-Frequency HIV-1 Drug Resistance Mutations and  
646 Risk of NNRTI-Based Antiretroviral Treatment Failure: A Systematic Review and Pooled  
647 Analysis. *JAMA* 2011; **305**: 1327–35.
- 648 24Simen BB, Simons JF, Hullsiek KH, *et al.* Low-Abundance Drug-Resistant Viral Variants in  
649 Chronically HIV-Infected, Antiretroviral Treatment–Naive Patients Significantly Impact  
650 Treatment Outcomes. *J Infect Dis* 2009; **199**: 693–701.
- 651 25Chang LW, Grabowski MK, Ssekubugu R, *et al.* Heterogeneity of the HIV epidemic in  
652 agrarian, trading, and fishing communities in Rakai, Uganda: an observational  
653 epidemiological study. *Lancet HIV* 2016; **3**: e388–96.
- 654 26Kagulire SC, Opendi P, Stamper PD, *et al.* Field evaluation of five rapid diagnostic tests for  
655 screening of HIV-1 infections in rural Rakai, Uganda. *Int J STD AIDS* 2011; **22**: 308–9.

- 656 27Elm EV, Altman DG, Egger M, Pocock SJ, Gøtzsche PC, Vandenbroucke JP. Strengthening  
657 the reporting of observational studies in epidemiology (STROBE) statement: guidelines for  
658 reporting observational studies. *BMJ* 2007; **335**: 806–8.
- 659 28Pillay D, Herbeck J, Cohen MS, *et al.* PANGEA-HIV: phylogenetics for generalised  
660 epidemics in Africa. *Lancet Infect Dis* 2015; **15**: 259–61.
- 661 29Abeler-Dörner L, Grabowski MK, Rambaut A, Pillay D, Fraser C. PANGEA-HIV 2:  
662 Phylogenetics And Networks for Generalised Epidemics in Africa. *Curr Opin HIV AIDS*  
663 2019; **14**: 173–80.
- 664 30Gall A, Ferns B, Morris C, *et al.* Universal Amplification, Next-Generation Sequencing, and  
665 Assembly of HIV-1 Genomes. *J Clin Microbiol* 2012; **50**: 3838–44.
- 666 31Bonsall D, Golubchik T, de Cesare M, *et al.* A Comprehensive Genomics Solution for HIV  
667 Surveillance and Clinical Monitoring in Low-Income Settings. *J Clin Microbiol* 2020; **58**:  
668 e00382-20.
- 669 32Wymant C, Blanquart F, Golubchik T, *et al.* Easy and accurate reconstruction of whole HIV  
670 genomes from short-read sequence data with shiver. *Virus Evol* 2018; **4**.  
671 DOI:10.1093/ve/vey007.
- 672 33Siepel AC, Halpern AL, Macken C, Korber BTM. A Computer Program Designed to Screen  
673 Rapidly for HIV Type 1 Intersubtype Recombinant Sequences. *AIDS Res Hum Retroviruses*  
674 1995; **11**: 1413–6.
- 675 34Fogel JM, Bonsall D, Cummings V, *et al.* Performance of a high-throughput next-generation  
676 sequencing method for analysis of HIV drug resistance and viral load. *J Antimicrob*  
677 *Chemother* 2020; **75**: 3510–6.
- 678 35Bolger AM, Lohse M, Usadel B. Trimmomatic: A flexible trimmer for Illumina sequence  
679 data. *Bioinformatics* 2014; **30**: 2114–20.
- 680 36Broad Institute. Picard tools. <https://Broadinstitute.Github.Io/Picard/>. 2016.  
681 <https://broadinstitute.github.io/picard/%5Cnhttp://broadinstitute.github.io/picard/>.
- 682 37McGinnis S, Madden TL. BLAST: at the core of a powerful and diverse set of sequence  
683 analysis tools. *Nucleic Acids Res* 2004; **32**: W20–5.
- 684 38Ji H, Enns E, Brumme CJ, *et al.* Bioinformatic data processing pipelines in support of next-  
685 generation sequencing-based HIV drug resistance testing: the Winnipeg Consensus. *J Int*  
686 *AIDS Soc* 2018; **21**: e25193.
- 687 39Rhee S-Y. Human immunodeficiency virus reverse transcriptase and protease sequence  
688 database. *Nucleic Acids Res* 2003; **31**: 298–303.
- 689 40Shafer RW. Rationale and Uses of a Public HIV Drug Resistance Database. *J Infect Dis*  
690 2006; **194**: S51–8.

- 691 41Liu TF, Shafer RW. Web Resources for HIV Type 1 Genotypic-Resistance Test  
692 Interpretation. *Clin Infect Dis* 2006; **42**: 1608–18.
- 693 42R Core Team. R: A Language and Environment for Statistical Computing. Vienna, Australia,  
694 2020 <https://www.R-project.org/> (accessed Dec 11, 2020).
- 695 43Zou G. A Modified Poisson Regression Approach to Prospective Studies with Binary Data.  
696 *Am J Epidemiol* 2004; **159**: 702–6.
- 697 44Halekoh U, Højsgaard S, Yan J. The R Package **geepack** for Generalized Estimating  
698 Equations. *J Stat Softw* 2006; **15**. DOI:10.18637/jss.v015.i02.
- 699 45Lenth RV. emmeans: Estimated Marginal Means, aka Least-Squares Means. 2024  
700 <https://CRAN.R-project.org/package=emmeans>.
- 701 46Wickham H, Averick M, Bryan J, *et al.* Welcome to the Tidyverse. *J Open Source Softw*  
702 2019; **4**: 1686.
- 703 47Wickham H, Chang W, Henry L, *et al.* ggplot2: Elegant Graphics for Data Analysis. Springer-  
704 Verlag New York, 2021 <http://ggplot2.org> (accessed Feb 8, 2022).
- 705 48Wilke CO. cowplot: Streamlined Plot Theme and Plot Annotations for ‘ggplot2’. 2020.  
706 <https://CRAN.R-project.org/package=cowplot>.
- 707 49Lin Pedersen T. patchwork: The Composer of Plots. 2023. [https://cran.r-](https://cran.r-project.org/web/packages/patchwork/index.html)  
708 [project.org/web/packages/patchwork/index.html](https://cran.r-project.org/web/packages/patchwork/index.html).
- 709 50FC M, Davis TL, ggplot2 authors. ggpattern: ‘ggplot2’ Pattern Geoms. 2022.  
710 <https://github.com/coolbutuseless/ggpattern>.
- 711 51Wickham H, Bryan J. readxl: Read Excel Files. 2023. <https://readxl.tidyverse.org>.
- 712 52Wickham H, Miller E, Smith D. haven: Import and Export ‘SPSS’, ‘Stata’ and ‘SAS’ Files.  
713 2023. <https://github.com/tidyverse/haven>.
- 714 53Margot NA, Ram RR, White KL, Abram ME, Callebaut C. Antiviral activity of HIV-1  
715 integrase strand-transfer inhibitors against mutants with integrase resistance-associated  
716 mutations and their frequency in treatment-naïve individuals. *J Med Virol* 2019; **91**: 2188–  
717 94.
- 718 54Azijn H, Tirry I, Vingerhoets J, *et al.* TMC278, a Next-Generation Nonnucleoside Reverse  
719 Transcriptase Inhibitor (NNRTI), Active against Wild-Type and NNRTI-Resistant HIV-1.  
720 *Antimicrob Agents Chemother* 2010; **54**: 718–27.
- 721 55Loosli T, Hossmann S, Ingle SM, *et al.* HIV-1 drug resistance in people on dolutegravir-based  
722 antiretroviral therapy: a collaborative cohort analysis. *Lancet HIV* 2023; **10**: e733–41.

- 723 56Schramm B, Temfack E, Descamps D, *et al.* Viral suppression and HIV-1 drug resistance 1  
724 year after pragmatic transitioning to dolutegravir first-line therapy in Malawi: a prospective  
725 cohort study. *Lancet HIV* 2022; **9**: e544–53.
- 726 57Tisdale M, Kemp SD, Parry NR, Larder BA. Rapid in vitro selection of human  
727 immunodeficiency virus type 1 resistant to 3'-thiacytidine inhibitors due to a mutation in the  
728 YMDD region of reverse transcriptase. *Proc Natl Acad Sci* 1993; **90**: 5653–6.
- 729 58Wainberg MA, Miller MD, Quan Y, *et al.* In vitro Selection and Characterization of HIV-1  
730 with Reduced Susceptibility to PMPA. *Antivir Ther* 1999; **4**: 87–94.
- 731 59Tzou PL, Rhee S-Y, Descamps D, *et al.* Integrase strand transfer inhibitor (INSTI)-resistance  
732 mutations for the surveillance of transmitted HIV-1 drug resistance. *J Antimicrob Chemother*  
733 2020; **75**: 170–82.
- 734 60Tao K, Rhee S-Y, Chu C, *et al.* Treatment Emergent Dolutegravir Resistance Mutations in  
735 Individuals Naïve to HIV-1 Integrase Inhibitors: A Rapid Scoping Review. *Viruses* 2023; **15**:  
736 1932.
- 737 61Huik K, Hill S, George J, *et al.* High-level dolutegravir resistance can emerge rapidly from  
738 few variants and spread by recombination: implications for integrase strand transfer inhibitor  
739 salvage therapy. *AIDS* 2022; **36**: 1835–40.
- 740 62Zhang WW, Cheung PK, Oliveira N, Robbins MA, Harrigan PR, Shahid A. Accumulation of  
741 Multiple Mutations In Vivo Confers Cross-Resistance to New and Existing Integrase  
742 Inhibitors. *J Infect Dis* 2018; **218**: 1773–6.
- 743 63George JM, Kuriakose SS, Dee N, *et al.* Rapid Development of High-Level Resistance to  
744 Dolutegravir With Emergence of T97A Mutation in 2 Treatment-Experienced Individuals  
745 With Baseline Partial Sensitivity to Dolutegravir. *Open Forum Infect Dis* 2018; **5**: ofy221.
- 746 64Grabowski MK, Reynolds SJ, Kagaayi J, *et al.* The validity of self-reported antiretroviral use  
747 in persons living with HIV: a population-based study. *AIDS* 2018; **32**: 363–9.
- 748 65Kühnert D, Kouyos R, Shirreff G, *et al.* Quantifying the fitness cost of HIV-1 drug resistance  
749 mutations through phylodynamics. *PLOS Pathog* 2018; **14**: e1006895.
- 750
